1     Gene expression noise produces cell-to-cell heterogeneity in  
2                    eukaryotic homologous recombination rate

3

4     Jian Liu <sup>1</sup>, Jean-Marie François <sup>1</sup> and Jean-Pascal Capp <sup>1\*</sup>

5

6

7     <sup>1</sup> INSA/Université de Toulouse, Laboratoire d'Ingénierie des Systèmes Biologiques et des Procédés,  
8     UMR CNRS 5504, UMR INRA 792, Toulouse, France

9

10    \* Correspondence

11    Dr Jean-Pascal Capp

12    [capp@insa-toulouse.fr](mailto:capp@insa-toulouse.fr)

13

14    Key words: Stochastic gene expression, recombination, *Saccharomyces cerevisiae*, yeast, single-cell  
15    analysis, rate of evolution

16 Abstract

17 Variation in gene expression among genetically identical individual cells (called gene  
18 expression noise) directly contributes to phenotypic diversity. Whether such variation can  
19 impact genome stability and lead to variation in genotype remains poorly explored. We  
20 addressed this question by investigating whether noise in the expression of genes affecting  
21 homologous recombination (HR) activity either directly (*RAD52*) or indirectly (*RAD27*)  
22 confers cell-to-cell heterogeneity in HR rate in *Saccharomyces cerevisiae*. Using cell sorting  
23 to isolate subpopulations with various expression levels, we show that spontaneous HR rate is  
24 highly heterogeneous from cell-to-cell in clonal populations depending on the cellular amount  
25 of proteins affecting HR activity. Phleomycin-induced HR is even more heterogeneous,  
26 showing that *RAD27* expression noise strongly affects the rate of recombination from cell-to-  
27 cell. Strong variations in HR rate between subpopulations are not correlated to strong changes  
28 in cell cycle stage. Moreover, this heterogeneity occurs even when simultaneously sorting  
29 cells at equal expression level of another gene involved in DNA damage response (*BMH1*)  
30 that is upregulated by DNA damage, showing that the initiating DNA damage is not  
31 responsible for the observed heterogeneity in HR rate. Thus gene expression noise seems  
32 mainly responsible for this phenomenon. Finally, HR rate non-linearly scales with Rad27  
33 levels showing that total amount of HR cannot be explained solely by the time- or population-  
34 averaged Rad27 expression. Altogether, our data reveal interplay between heterogeneity at the  
35 gene expression and genetic levels in the production of phenotypic diversity with evolutionary  
36 consequences from microbial to cancer cell populations.

37

## 38 1. Introduction

39 Expression variations of genes linked to DNA repair and recombination often affect  
40 genome stability (Stirling et al., 2011; Ang et al., 2016; Duffy et al., 2016). Whether variable  
41 expression levels from cell-to-cell due to gene expression noise could affect homologous  
42 recombination (HR) rate and thus genome stability in different subpopulations of clonal  
43 populations has not been addressed yet. Noise in gene expression is the variation in the  
44 expression level of a gene under constant environmental conditions (Raser and O'Shea, 2005).  
45 Downstream effects of noise can have profound phenotypic consequences, drastically  
46 affecting gene expression (Blake et al., 2003). This variation in gene expression among  
47 genetically identical individual cells could be an advantage in that it would allow  
48 heterogeneous phenotypes even in clonal populations, enabling a population of organisms to  
49 contain subpopulations with different behaviours and favouring emergence of adapted cells  
50 upon environment fluctuation and/or stress conditions (Fraser and Kaern, 2009). Interestingly,  
51 genes involved in environmental stress response and metabolism have higher levels of  
52 expression noise compared to genes of other biological function in yeast and bacteria (Bar-  
53 Even et al., 2006; Newman et al., 2006; Silander et al., 2012). Nevertheless, noise in the  
54 expression of precise genes has rarely been shown to be the source of advantageous  
55 phenotypic heterogeneity (bet-hedging strategy) and few studies have investigated fitness  
56 effects of noise (Viney and Reece, 2013; Liu et al., 2016).

57 In *S. cerevisiae* expression noise in stress resistance genes confers a benefit in constant  
58 stressful conditions because it generates, in the absence of stress, a phenotypic diversity that  
59 makes the presence of pre-adapted cells more probable (Blake et al., 2006; Smith et al., 2007;  
60 Liu et al., 2015). In addition, recent works showed that heterogeneity in resistance phenotypes  
61 due to noise clearly promotes evolvability and shapes mutational effects, partly by modulating  
62 the adaptive value of beneficial mutations (Bodi et al., 2017). Also, noise in the expression of  
63 genes involved in the DNA replication, repair and recombination processes could directly  
64 produce cell-to-cell heterogeneity in the rate of mutation and/or recombination that would  
65 also have consequences in terms of evolvability of the population in selective environments  
66 (Capp, 2010). Such heterogeneity in mutation rate were recently theoretically studied at  
67 various evolutionary timescales (Alexander et al., 2017).

68 Impact of noise in gene expression on cellular response to DNA damage was  
69 investigated in *Escherichia coli* by monitoring the impact of expression variation of the Ada  
70 protein in response to DNA alkylation damage (Uphoff et al., 2016). These authors showed  
71 that variable induction times of the damage response were observed depending on the initial  
72 expression level of Ada, with cells that do not respond for generations because no Ada  
73 proteins are initially expressed. This creates a subpopulation of cells with an accumulation of  
74 foci of the DNA mismatch recognition protein MutS used as a marker for labeling nascent  
75 mutations (Uphoff et al., 2016), showing heterogeneity in the mutation rate at the single-cell  
76 level. The conclusion of the study highlighted that non-genetic variation in protein  
77 abundances thus leads to genetic heterogeneity. Nevertheless, this measurement remains an  
78 indirect evaluation of the genetic heterogeneity through the detection of a mismatches  
79 biosensor. Moreover neither the genetic consequences of noise in expression of DNA repair  
80 genes on a genomic substrate, nor its subsequent phenotypic consequences, were analyzed.  
81 Finally investigating similar phenomena in eukaryotes is motivated by their higher number of  
82 different proteins and more complex pathways involved in the DNA replication, repair and  
83 recombination processes that diversify and multiply the possible sources of cell-to-cell  
84 variation in mutation and recombination rate.

85 For simplicity, HR can be defined as the repair of DNA lesions based on homologous  
86 sequences (Symington et al., 2014). It underlies a number of important DNA processes that  
87 act to both stabilize (e.g. repair of DNA double-strand breaks (DSBs)) and diversify  
88 (generation of crossover during meiosis) a genome. Meiotic HR rate for instance has revealed  
89 considerable inter-individual differences (Dumont et al., 2009) or extensive variations along  
90 chromosomes (Kauppi et al., 2004). But technical limitations only allowed studies on whole  
91 cell populations, providing an averaged view of this process. Only recent studies of meiotic  
92 HR have revealed the diversity in crossover frequency in single sperm cells (Lu et al., 2012;  
93 Wang et al., 2012) or oocytes (Hou et al., 2013). Spontaneous mitotic HR rate also varies  
94 along chromosomes, with for instance elevated recombination rates in transcriptionally active  
95 DNA (Thomas and Rothstein, 1989), but analysis of cell-to-cell heterogeneity in mitotic HR  
96 rate in clonal cell populations is still lacking.

97 Mitotic HR is entirely conservative when it occurs following DNA replication where a  
98 sister chromatid is available as a template. However, HR acting on DSB can produce genome  
99 instability, especially when utilizing sequences on a homologous chromosome that can lead to  
100 crossovers and potential loss of heterozygosity, or when occurring between dispersed repeated  
101 DNA. Indeed interrepeat recombination can cause deletions, duplications, inversions or  
102 translocations, depending on the configuration and orientation of the repeat units. These non-  
103 conservative events are especially studied in this work because there are of major importance  
104 for evolution.

105 HR pathways are particularly well-documented in *S. cerevisiae* (Paques and Haber,  
106 1999; Symington et al., 2014). A diversity of mechanisms can modify HR activity, either  
107 indirectly by increasing the generation of DNA lesions, or directly by blocking the completion  
108 of HR and/or altering the kinetics of genetic recombination and the assembly/disassembly of  
109 the HR protein complexes (Alvaro et al., 2007). Each class of mechanism is respectively well-  
110 represented in *S. cerevisiae* by the absence of the *RAD27* and *RAD52* genes. On one hand,  
111 Rad52 is involved in multiple pathways of repairing DSB (Symington, 2002). It binds single-  
112 stranded DNA to stimulate DNA annealing and to enhance Rad51-catalyzed strand invasion  
113 during the HR process called synthesis-dependent strand annealing (New et al., 1998; Song  
114 and Sung, 2000). It is also involved in Rad51-independent pathways used to repair DSB such  
115 as single-strand annealing (SSA) (Symington et al., 2014). SSA is stimulated if the DSB lies  
116 in a unique sequence between two repeated sequences and can lead to the repeat contraction  
117 or expansion. The various roles of Rad52 explain the highly defective mitotic recombination  
118 in *rad52* *S. cerevisiae* mutants (Dornfeld and Livingston, 1992; Rattray and Symington,  
119 1994). On the other hand, the *RAD27* gene of *S. cerevisiae* encodes a 5'-3' flap  
120 exo/endonuclease, which is a functional homolog of mammalian FEN1/DNaseIV that plays  
121 an important role during DNA replication for Okazaki fragment maturation (Balakrishnan and  
122 Bambara, 2013). It cleaves the unannealed 5' "flap" structure containing the primer that  
123 appears in 5' of the previous Okazaki fragment after synthesis of the next one (Zheng and  
124 Shen, 2011). The absence of *RAD27* generates an accumulation of 5' flap structures that can  
125 be resolved by the Rad52 dependent-HR pathway (Debrauwere et al., 2001). *S. cerevisiae*  
126 *rad27*Δ mutants accumulate of single- and DSB (Tishkoff et al., 1997) and display a broad  
127 array of defects in genome stability including an increased spontaneous recombination  
128 (Johnson et al., 1995; Sommers et al., 1995; Tishkoff et al., 1997).

129 Here we choose to use a *S. cerevisiae* strain containing a HR substrate that allows  
130 measuring the rate of non-conservative interrepeat recombination events and to sort  
131 subpopulations depending on the native expression level of *RAD27* and *RAD52*. The  
132 antagonist effects of their deletion on HR frequency and their different modes of action (direct

133 or indirect) to affect HR led us to choose these two genes to study the influence of their  
134 heterogeneous cellular amounts. This study provides evidence that cell-to-cell expression  
135 fluctuations of Rad27 and Rad52 produce heterogeneity in both spontaneous and induced HR  
136 frequency in the population. Moreover HR rate non-linearly scales with Rad27 levels. The  
137 recombination rate varies strongly above the mean Rad27 expression level of the population  
138 before reaching a plateau at its highest values for the highest expression levels. Finally, it does  
139 not result from differences in cell cycle distribution, and can be hardly explained by  
140 heterogeneity in DNA damage because it occurs also when cells are simultaneously sorted at  
141 equal level of the Bmh1 protein that is upregulated by DNA damage. Altogether, these results  
142 showed that noise in the expression of genes involved in DNA transactions can lead to  
143 heterogeneous homologous recombination rate between individual eukaryotic cells.

144

## 145 2. Material and Methods

### 146 2.1. Yeast strains and growth conditions

147 All the strains and primers used in this work are listed in Supplementary Tables 2 and 3,  
148 respectively. The strain KV133 (Verstrepen et al., 2005) (BY4742 *MAT $\alpha$* ; *his3 $\Delta$ 1*; *leu2 $\Delta$ 0*;  
149 *lys2 $\Delta$ 0*; *ura3 $\Delta$ 0 FLO1::URA3*) (URA3 inserted in the middle of the tandem repeats) was  
150 kindly provided by Kevin J Verstrepen (KU Leuven). To create strain JA0200 from KV133, a  
151 PCR fragment containing *LEU2* and its native promoter and terminator was amplified from  
152 the genomic DNA of the S288c strain with primers F1 and R1, and transformed into KV133.  
153 The construction was verified by PCR with primers C1 and C2. To create the strains  
154 containing the fusion *RAD27-YFP* and *RAD52-YFP* (JA0219 and JA0220 respectively), PCR  
155 fragments containing *YFP-kanR* and homologies to *RAD27* or *RAD52* were amplified with  
156 primers F2 and R2, or primers F3 and R3 respectively, from the plasmid *pfa6a-YFP-kanR*  
157 (constructed in our lab), and transformed into JA0200. The constructions were verified by  
158 PCR with primers C3 and C4, or C5 and C4 respectively. To create the strains containing the  
159 double fusion *RAD27-YFP-tdTomato* and *RAD52-YFP-tdTomato* (JA0240 and JA0241  
160 respectively), PCR fragments containing *tdTomato-SpHis5* and homologies to *YFP* were  
161 amplified with primers F4 and R4 from the plasmid *pfa6a-link-tdTomato-SpHis5* (Addgene),  
162 and transformed into JA0219 and JA0220. The constructions were verified by PCR with  
163 primers C3 and C6, or C5 and C6 respectively. To delete *RAD27* (strain JA0217), a PCR  
164 fragment containing *LYS2* and homologies to *RAD27* was amplified from the genomic DNA  
165 of the S288c strain with primers F6 and R6, and transformed into JA0200. The construction  
166 was verified by PCR with primers C7 and C8. To insert *pBMH1-yEGFP* into the strains  
167 JA0240 and JA0200 (strains JA0242 and JA0243 respectively), the integrative plasmid  
168 *pJRL2-pBMH1-yEGFP* containing homologies to *LEU2* was cut by *AscI* (New England  
169 Biolabs) and transformed. The construction was verified by PCR with primers C9 and C2. All  
170 the transformations were carried out by the standard lithium acetate method.

171 All the strains were grown in liquid YNB medium (20 g/L glucose (Sigma), 1.71 g.L<sup>-1</sup>  
172 yeast nitrogen base without amino acids and nitrogen (Euromedex) and 5 g.L<sup>-1</sup> ammonium  
173 sulfate (Sigma)) at 30°C with rigorous shaking (200 rpm). Auxotrophic strains were  
174 supplemented with the required molecules at the following concentrations: 0.02 g.L<sup>-1</sup> histidine  
175 (Sigma), 0.05 g.L<sup>-1</sup> lysine (Sigma) and 0.1 g.L<sup>-1</sup> leucine (Sigma). For phleomycin treatment,  
176 cells in stationary phase were diluted 100 times in YNB medium containing 5  $\mu$ g.mL<sup>-1</sup>  
177 phleomycin (Sigma) and grown at 30°C with rigorous shaking (200rpm) for 16 hours.

178 The YPD plates contained 20 g.L<sup>-1</sup> glucose, 20 g.L<sup>-1</sup> agar (Euromedex), 10 g.L<sup>-1</sup>  
179 peptone (Euromedex) and 10 g.L<sup>-1</sup> yeast extraction (Euromedex). The 5-FOA and CAN plates  
180 contained 20 g.L<sup>-1</sup> glucose, 20 g.L<sup>-1</sup> agar, 1.71 g.L<sup>-1</sup> yeast nitrogen base, 5 g.L<sup>-1</sup> ammonium  
181 sulfate, 0.79 g.L<sup>-1</sup> complete supplement mixture (Euromedex) and 1 g.L<sup>-1</sup> 5-FOA  
182 (Euromedex) or 0.06 g.L<sup>-1</sup> canavanine (Sigma) respectively.

183

### 184 2.2. Fluorescence activated cell sorting

185 The cell sorting experiments were carried out on the MoFlo Astrios EQ cell sorter with  
186 the Summit v6.3 software (Beckman Coulter). Cells in stationary phase were diluted 100  
187 times and grown at 30°C with rigorous shaking (200 rpm) for 16 hours prior to cell sorting  
188 (final OD  $\approx$  2). Cultures were spun down at 3000g for five minutes at 4°C. Growth media was  
189 removed and cells were re-suspended in ice cold PBS. The SmartSampler and CyClone tubes

190 holder were kept at 4°C during cell sorting. Cell sorting was carried out with 70µm nozzle  
191 and 60psi operating pressure. The sorting speed was kept around 30 000 events per second.  
192 The purity mode for the sort mode and 1 drop for the droplet envelope were chosen. Based on  
193 the FSC-Area vs SSC-Area (488 nm laser) plot and the FSC-Height vs FSC-Area (488 nm  
194 laser) plot, single cells with similar cell size and granularity were first selected. Then based on  
195 the histogram of the YFP-tdTomato fluorescence (560 nm laser, 614/20 filter), single cells  
196 with 10% highest fluorescence and 10% lowest fluorescence were sorted simultaneously  
197 (Figure 2); or single cells were sorted simultaneously into five subpopulations distributed as  
198 follows: 0-10%, median between the median of the 0-10% and the median of the whole  
199 population +/- 5%, median of the whole population +/- 5%, median between the median of the  
200 whole population and the median of the 90-100% +/- 5%, 90-100% (Figure 3). This division  
201 allowed reproducible sorting between replicates even if slight variations of the distribution of  
202 absolute expression levels occurred.

203 To sort GFP and YFP-tdTomato simultaneously, the fluorescence of the strains with  
204 only GFP (488 nm laser, 526/52 filter, strain JA0243) or YFP-tdTomato (560 nm laser,  
205 614/20 filter, strain JA0240) was first measured. There is only negligible overlap between  
206 these fluorophores, hence there was no need for compensation. Then based on the GFP vs  
207 YFP-tdTomato plot of the strain JA0242, 5% single cells of the total population with similar  
208 GFP fluorescence as the mean of the population but extreme YFP-tdTomato fluorescence  
209 were sorted, as well as 5% single cells of the total population with similar YFP-tdTomato  
210 fluorescence as the mean of the population but extreme GFP fluorescence.

211

### 212 2.3. Measurement of HR frequency

213 To measure the HR frequency of the whole population, 500 µL culture (OD ≈ 2) was  
214 spread on 5-FOA petri plates (100×15 mm, Fisherbrand). The culture was diluted 10 000  
215 times and 20 µL diluted culture was spread on YPD petri plates. The plates were kept in 30°C  
216 incubator for 3 days and the number of clones was counted. The size of the new *FLO1* alleles  
217 from the clones isolated on the 5-FOA plates was analyzed by PCR using primers F5 and R5.  
218 The presence of *URA3* was verified using primers C10 and C11. The size of *FLO5* and *FLO9*  
219 were further analyzed by primers C13 and R5 or C12 and R5 respectively. Then the frequency  
220 of loss of *URA3* function was calculated as follow:

$$221 \quad f = \frac{n_{5-FOA} \times 20}{n_{YPD} \times 10\,000 \times 500} \quad (1)$$

222 where  $f$  denotes the frequency of loss of *URA3* function,  $n_{5-FOA}$  denotes the number of  
223 clones on the 5-FOA plates, and  $n_{YPD}$  denotes the number of clones on the YPD plates.

224 To measure the frequency of loss of *URA3* function of the subpopulations,  $5 \cdot 10^6$  to  $10^7$   
225 cells (depending on the replicate) of each subpopulation were sorted (around 10 mL) and  
226 spread on 5-FOA square culture dishes (224×224×25 mm, Corning). Then 100 cells were  
227 sorted and spread on YPD plates. The dishes were kept in 30°C incubator for 3 days and the  
228 number of clones was counted. The size of the new *FLO1* alleles, the presence of *URA3* or the  
229 size of the *FLO5* and *FLO9* alleles were analyzed by PCR from the clones isolated on the 5-  
230 FOA plates using primers F5 and R5, C13 and R5 or C12 and R5 respectively. Then the  
231 frequency of loss of *URA3* function was calculated as follow:

$$232 \quad f = \frac{n_{5-FOA} \times 100}{n_{YPD} \times n_{sorting}} \quad (2)$$

233 where  $f$  denotes the frequency of loss of *URA3* function,  $n_{5-FOA}$  denotes the number of  
234 clones on the 5-FOA dishes,  $n_{YPD}$  denotes the number of clones on the YPD plates, and  
235  $n_{sorting}$  denotes the number of cells sorted.

236

#### 237 2.4. Analysis of cell cycle stage distribution

238  $10^6$  cells were sorted and fixed in 70% ethanol at 4°C for at least 12 hours. They were  
239 then washed in 50 mM sodium citrate (Sigma) buffer (pH 7.5) and treated by RNase A  
240 (Eurogentec) and proteinase K (Eurogentec). Yo-Pro-I (Thermer Fisher) was used to stain the  
241 genomic DNA. The relative DNA content was measured by MACSQuant® VYB flow  
242 cytometry (Miltenyi Biotec).

243

#### 244 2.5. Statistics

245 The Wilcoxon signed rank test was performed in R (version 3.4.1) with the `wilcox.test`  
246 function.

247



## 248 3.Results

### 249 3.1. Noise in the expression of *RAD52* and *RAD27* produces heterogeneity in spontaneous and 250 induced HR rate

251 The system developed by Verstrepen *et al* to measure non-conservative HR between  
252 intragenic tandem repeats (Verstrepen *et al.*, 2005) used the auxotrophic marker *URA3*  
253 integrated in the tandem repeats of the *FLO1* gene in *S. cerevisiae* (Figure 1A). As  
254 recombinants do not grow on the initial medium where *URA3* is needed for growth because  
255 uracil is lacking (no clonal expansion possible), the frequency of yeast cells then growing on  
256 5-FOA-containing medium provides a quantitative estimate of the actual recombination rates  
257 (number of events per cell division) as previously suggested (Verstrepen *et al.*, 2005).  
258 However the loss of *URA3* function could also arise by direct mutations in the *URA3* coding  
259 region.

260  
261 This system confirmed that the absence of *RAD27* and *RAD52* respectively strongly  
262 increases and decreases the HR frequency (Verstrepen *et al.*, 2005). The increased  
263 recombination frequency in *rad27* $\Delta$  mutants suggests that *FLO1* repeat instability is  
264 associated with the occurrence of DSB due to defective DNA replication (Kokoska *et al.*,  
265 1998). The absence of an effect in *rad51* $\Delta$  mutants and the decrease in recombination  
266 observed in various other mutants, especially *rad50* $\Delta$  and *rad52* $\Delta$ , suggests that recombination  
267 in this system does not require strand invasion and depends on DSB repair by SSA  
268 (Verstrepen *et al.*, 2005). Nevertheless, one cannot exclude that loss of *URA3* could happen  
269 preferentially through gene conversion-associated crossing over in wild-type cells and that  
270 repair could switch to SSA in *rad51* $\Delta$  mutants.

271  
272 Subpopulations were sorted based on the expression level of *RAD52* or *RAD27* fused to  
273 *YFP* and *tdTomato* at their original genomic locus (Figure 1B). A fluorescent signal above the  
274 auto-fluorescence level for the whole population was needed to efficiently sort even the cells  
275 expressing *RAD52* and *RAD27* at the lowest levels. Thus, we chose *tdTomato* which is one  
276 the brightest fluorescence protein to be fused to *Rad52* and *Rad27* because of the low  
277 expression of the corresponding genes, and added *YFP* that improved the fluorescence of our  
278 tagged proteins compared to *tdTomato* only. This *YFP-tdTomato* double fusion to the C-  
279 terminal domain of *Rad52* seems not to affect its functionality because the average HR  
280 frequency in the population was the same as in the wild-type (Supplementary Figure 1). On  
281 the contrary the *Rad27-YFP-tdTomato* fusion slightly decreased this average HR frequency  
282 (Supplementary Figure 1). Nevertheless the functionality of the fused *Rad27-YFP-tdTomato*  
283 protein is close to the native protein because it confers an HR rate that is in the same order of  
284 magnitude as the wild-type when compared to the strongly increased HR frequency in *rad27* $\Delta$   
285 mutants (Supplementary Figure 1).

286 Among the heterogeneous expression levels of these genes at the single-cell level, we  
287 first isolated the two extreme subpopulations in terms of fluorescence intensity, each of them  
288 representing 10% of the whole population. While viability was similar for both  
289 subpopulations (Supplementary Figure 2), the rate of loss of *URA3* function as determined by  
290 the frequency of cells growing on 5-FOA plates (Figure 1B) was 10-times higher for the  
291 *Rad27*-high subpopulation (Figure 2A and Supplementary Table 1) and 4-times higher for the  
292 *Rad52*-high subpopulation (Figure 2B and Supplementary Table 1) compared to the low-  
293 subpopulations.

294 PCR amplification of the new *FLO1* alleles in 5-FOA resistant clones showed that  
295 *FLO1* is modified in the Rad27-high and Rad52-high subpopulations, and not in the Rad27-  
296 low and Rad52-low subpopulations, suggesting that recombination events and rearrangements  
297 among tandem repeats indeed led to the loss of *URA3* only in the formers (Figure 2D and  
298 Supplementary Figure 3). As 5-FOA resistance can also arise through mutations in the *URA3*  
299 coding region, we wanted to actually confirm the nature of the genetic changes by testing the  
300 presence of the *URA3* gene in the resistant clones. We confirmed that the loss of *URA3* gene  
301 in the Rad27-high and Rad52-high subpopulations occurred by recombination between  
302 intragenic repeats in *FLO1* (Figure 2D and Supplementary Figure 3). The variability of the  
303 size of the new *FLO1* alleles seen in Supplementary Figure 3 shows that these clones likely  
304 occurred during independent events and that they were not the result of clonal expansion. On  
305 the contrary, 5-FOA resistant clones from the Rad27-low and Rad52-low subpopulations still  
306 contained the *URA3* gene at the expected size, showing that they likely acquired 5-FOA  
307 resistance by mutation (Figure 2D and Supplementary Figure 3). Thus, the precise difference  
308 in HR rate between these extreme subpopulations cannot be quantified because of the absence  
309 of detectable recombinant cells in the subpopulations with the lowest expression levels.

310 The finding that Rad52-high cells harbor higher HR rate is in accordance with its direct  
311 involvement in HR pathways. In contrast, it is at first glance counterintuitive to find Rad27-  
312 high cells with the highest HR rate considering that the deletion of this gene leads to increased  
313 recombination, even if, as mentioned above, Rad27-YFP-tdTomato did not fully recapitulate  
314 the functionality of the native Rad27 protein.

315 To confirm the heterogeneity in spontaneous HR rate produced by the *RAD27*  
316 heterogeneous expression levels, we induced the production of DSB by pretreating cells with  
317 5  $\mu\text{g}\cdot\text{ml}^{-1}$  phleomycin for 16 h. This chemical is a water-soluble antibiotic of the bleomycin  
318 family that catalyzes DSB in DNA (Moore, 1988), thus strongly increasing recombination  
319 frequency. Sublethal concentration was used to avoid loss of cell viability in the  
320 subpopulations (Supplementary Figure 2) and to affect as little as possible growth (Liu et al.,  
321 2015), yet allowing measurable effect of the amount of induced DSB without toxicity.  
322 Frequency of loss of *URA3* function is far more induced in the high-subpopulation than in the  
323 low-subpopulation following this pretreatment (Figure 2C and Supplementary Table 1). This  
324 stronger effect of the drug on the high level population is coherent with the fact that an  
325 increased level of Rad27 increases HR.

326 As it would appear difficult to reliably conclude the general effect of single-cell protein  
327 levels on recombination, we also assayed repeat expansion / contraction at other loci (*FLO5*  
328 and *FLO9*) in these clones as previously performed among *S. cerevisiae* strains (Verstrepen et  
329 al., 2005). No variation was detected (Supplementary Figure 4) but the probability to observe  
330 HR events in both of these loci in the same cell during the course of our experiments is  
331 extremely low. Even on the whole sorted subpopulations; the rarity of such events makes their  
332 detection impossible without any selective pressure to enrich them.

333

### 334 3.2. HR rate non-linearly scales with Rad27 levels

335 Considering the high heterogeneity in HR activity observed between Rad27-high and  
336 Rad27-low subpopulations, we ask whether the HR rate scales linearly or non-linearly with  
337 Rad27 levels. To do so, we performed the same experiment as described in Figure 1B but we  
338 sorted cells into five subpopulations homogeneously distributed in the population from the  
339 lowest (subpopulation 1) to the highest (subpopulation 5) expression levels (Figure 3A). Each

340 subpopulation represents 10% of the whole population. The sorting process is less efficient  
341 when cells are sorted into 5 subpopulations instead of two. Far more time is needed to get the  
342 same number of cells in a given subpopulation when sorting into 5 subpopulations. Thus we  
343 were only able to sort out only around  $2 \cdot 10^6$  for each subpopulation which lasted at least 3  
344 hours. Extending further the duration of the experiment would lead to bias linked to prolonged  
345 time in tubes before and after passage into the sorter, to the diluted medium in the harvest  
346 tubes... Moreover inducing DSB was not chosen for this experiment because phleomycin  
347 treatment slightly increases the *RAD27* expression level so that it does not allow studying  
348 basal expression level and spontaneous events that can be considered as more relevant to  
349 evolution.

350 By doing so, we did not detect any 5-FOA resistant cells in subpopulations 1 and 2 in  
351 any replicate (Supplementary Table 1). Only one clone was detected in subpopulation 3 in one  
352 experiment while many more and similar numbers of clones were observed in subpopulations  
353 4 and 5 (Supplementary Table 1). We confirmed again that these resistant clones are  
354 generated by recombination when Rad27 levels are high. As results were similar for  
355 subpopulation 5 in both sets of experiments, we chose to combine the results on these five  
356 subpopulations with the results from Figure 2A to plot the relationship between the frequency  
357 of loss of *URA3* function and Rad27 levels (Figure 3B). We indicated in this plot that  
358 resistance is mostly due to mutation-based inactivation of the *URA3* gene in the first  
359 subpopulations and to recombination-based loss of the *URA3* marker in subpopulations 4 and  
360 5. Thus, even we were not able to measure HR rate in the formers, it appears that HR rate  
361 non-linearly scales with Rad27 levels because it reaches a plateau in the latters after an abrupt  
362 variation that occurs at least between subpopulations 3 and 4 slightly above the mean  
363 expression level of the population.

364 Finally, we took advantage of having six independent replicates for high- and low-  
365 Rad27 subpopulations to perform a non-parametric statistical test. These data show a  
366 significant difference ( $p=0.03$ ) (Figure 3B), suggesting that for other data where the same  
367 tendency is observed with only three replicates (high- vs low-Rad52, high- vs low-Rad27 with  
368 phleomycin), similar conclusions could be drawn (these data constitute too small data samples  
369 to robustly apply proper statistical analysis).

370

### 371 3.3. Differences in cell cycle distribution do not explain heterogeneous HR rate

372 Since cell-cycle dependence of transcription dominates noise in gene expression (Zopf  
373 et al., 2013) and that transcript level of *RAD27* is not constant through the cell cycle  
374 (Skotheim et al., 2008), we determined whether the difference in recombination rate in the  
375 sorted subpopulations is not a consequence of different cell cycle states. We measured the cell  
376 cycle distribution among the same five sorted subpopulations. As the chosen sorting mode on  
377 the cytometer excluded most of the budding cells, strong enrichment in G1 cells was  
378 expected, that should limit the impact of cell cycle state or size differences. Indeed we  
379 observed almost exclusively G1 cells in subpopulations 1 to 3 (Figure 3C). Only  
380 subpopulation 5 contained more G2 cells.

381 This observation suggests that Rad27 expression heterogeneity is not mostly due to  
382 different cell cycle states, because the strong increase seen between subpopulations 3 and 4 is  
383 associated to only a slight difference in cell cycle distribution exist with a small G2 bump. If  
384 this appearance of G2 cells in subpopulation 4 was responsible for the strong increase in  
385 recombination frequency, we would expect an even higher increase in subpopulation 5 where

386 G2 are far more abundant. Instead, subpopulation 5 with the highest expression levels  
387 harbored the same frequency of loss of *URA3* function as subpopulation 4 in spite of its strong  
388 enrichment in G2 cells, making us thinking that cell cycle distribution only poorly influences  
389 recombination rate.

390

### 391 3.4. Heterogeneity in HR rate does not result from heterogeneity in DNA damage

392 Given the poor contribution of cell cycle and the unexpected correlation between the  
393 *RAD27* expression level and HR rate, we went further in deciphering the origins of the  
394 heterogeneity in HR rate. Apart from cell cycle, heterogeneity in DNA damage could affect  
395 recombination activity. To study this hypothesis, we performed a double sorting of extreme  
396 subpopulations based on the expression of Rad27-YFP-tdTomato on one hand, and the  
397 expression of GFP driven by the promoter of the *BMH1* gene (*pBMH1*) on the other hand  
398 (Figure 4A and 4B). Bmh1 is one of the two yeast 14-3-3 proteins and many studies also  
399 showed the important role of 14-3-3 proteins in DNA duplication and DNA damage response  
400 in fungi (Kumar, 2017). Especially, it directly modulates DNA damage-dependent functions  
401 of Rad53 (Usui and Petrini, 2007) and it is upregulated by DNA damage along with other  
402 protein factors associated with DNA damage response (Kim et al., 2011). Thus sorting cells  
403 with extreme levels of Rad27 and simultaneously at equal level of *pBMH1*-driven GFP should  
404 ensure observing the phenomenon in cells with similar levels of DNA damage and showing  
405 that heterogeneity in DNA damage is not responsible for it. Moreover, it possesses a relatively  
406 strong promoter that allows GFP expression largely above the auto-fluorescence threshold.

407 Frequency of loss of *URA3* function was again higher in Rad27-high than in Rad27-low  
408 cells when also sorting cells with the same GFP level (Figure 4C and Supplementary Table 1),  
409 with a 10-fold factor similar to the previous experiments (Figure 2A). No difference in  
410 viability was observed (Supplementary Figure 5). 5-FOA resistance was again due to  
411 recombination in Rad27-high sorted cells and to mutation in Rad27-low sorted cells, showing  
412 that the difference is due to differences in HR rate. On the contrary, both GFP-low and GFP-  
413 high subpopulations exhibited close frequency of loss of *URA3* function when also sorted at  
414 equal level of Rad27. However, we noticed that 5-FOA resistant clones were slightly more  
415 frequent in GFP-low cells (Figure 4C). This higher HR rate might be explained by the fact  
416 that cells expressing *BMH1* at lower levels might accumulate more DSB, which in turns could  
417 slightly enhance HR and/or mutation rate (Engels et al., 2011). Finally when analyzing cell  
418 cycle distribution, DNA content plot is shifted to the right for both high GFP and high  
419 tdTomato expressing cells (Figure 4D). If cell cycle distribution had a strong influence on  
420 recombination rate, both subpopulations would harbour increased frequency. Nevertheless a  
421 strong increase in the frequency of loss of *URA3* function is only observed in tdTomato-high  
422 cells and not in GFP-high cells (it is even lower in the latter case). This argues again against  
423 its contribution in the generation of HR rate heterogeneity.

424

#### 425 4.Discussion

426 We observed heterogeneous HR rates in the subpopulations expressing *RAD52* or  
427 *RAD27* at the lowest vs highest levels, with the highest rates produced by the highest  
428 expression levels. Stochastic variations in Rad27 or Rad52 expression seem to be mainly  
429 responsible for variation in HR rate, but other sources of gene expression heterogeneity  
430 probably amplify this phenomenon at the whole-population scale. However, we exclude that  
431 DNA damage heterogeneity is responsible for it because cells sorted at equal level of a DNA  
432 damage response protein (Bmh1) also harboured Rad27-dependent heterogeneity in HR rate.  
433 Moreover, viability is not more decreased by the phleomycin treatment in Rad27-high cells  
434 compared to the Rad27-low cells, suggesting that there is no more DNA damage that could  
435 explain higher expression in these cells. Finally, it is very unlikely that higher levels of Rad52  
436 or Rad27 are in this state because of more underlying DNA damage that induces expression of  
437 HR genes rather than because of stochastic expression fluctuations. The contribution of cell  
438 cycle stage seems also weak because strong variations in HR rate between subpopulations are  
439 not correlated to strong changes in cell cycle stage, even if other experiments could confirm  
440 this point, for instance by blocking cells either in G1 or in G2, sorting them according to the  
441 expression level and measuring induced HR.

442  
443 The correlation was unexpected concerning *RAD27* because *rad27* $\Delta$  mutants showed  
444 increased HR in various studies (Johnson et al., 1995; Sommers et al., 1995). In fact, HR was  
445 found to be essential in *rad27* $\Delta$  mutants (Symington, 1998). However it was observed that  
446 overexpression of Rad27 makes yeast cells sensitive to hydroxyurea (HU), methyl  
447 methanesulfonate (MMS) and bleomycine (Duffy et al., 2016; Becker et al., 2018).  
448 Additionally, the study by Duffy *et al* shows that the number of Rad52 spots increase when  
449 *rad27* is overexpressed. The study by Becker *et al* shows that Rad27 overexpression impedes  
450 replication fork progression and leads to an accumulation of cells in mid-S phase. Therefore it  
451 could be proposed that a high Rad27 level could generate DNA nicks or DSB that would  
452 induce an increase in HR frequency. Moreover previous results on chicken cells already  
453 suggested that Rad27 could facilitate HR by removing divergent sequences at DNA break  
454 ends (Kikuchi et al., 2005) making coherent the relationship we observed, even if it has also  
455 been shown as playing a role in limiting HR between short sequences in yeast (Negritto et al.,  
456 2001). Finally, it is worth noting that we tested phenotypic effects of gene expression noise  
457 providing limited quantitative variations from cell-to-cell unlike deletion experiments. Our  
458 results on Rad27 provide such example of molecular effects of weakly imbalanced protein  
459 levels that are the opposite of those resulting from simple deletion.

460 Apart from simple deletion (Yuen et al., 2007), expression variations of numerous genes  
461 are known to affect genome stability (Stirling et al., 2011; Ang et al., 2016; Duffy et al.,  
462 2016). As expected these genes are mainly involved in DNA damage response (e.g. DNA  
463 repair and recombination) and chromosome maintenance. In yeast, large scale screening  
464 revealed that many genes impact genome stability either when deleted (Yuen et al., 2007) or  
465 when differentially expressed (Stirling et al., 2011; Zhu et al., 2015; Duffy et al., 2016).  
466 Genetic events analyzed in these studies range from loss of a full mini-chromosome that  
467 measure chromosome instability (Yuen et al., 2007; Stirling et al., 2011; Zhu et al.,  
468 2015; Duffy et al., 2016) to loss of an endogenous locus (the mating type locus *MAT* on  
469 chromosome III for instance) that detect more limited genetic modifications (Yuen et al.,  
470 2007; Stirling et al., 2011; Duffy et al., 2016). These different types of measurements explain  
471 why genes impacting HR activity as *RAD52* and *RAD27* are not detected in the former case  
472 (Zhu et al., 2015), and observed in the latter (Yuen et al., 2007).

473 Two limitations can be highlighted about these works. First, genetic events resulting  
474 from multiple possible molecular mechanisms are detected, rendering impossible the  
475 quantitative analysis of a specific pathway in terms of event frequency. Loss of *URA3* inserted  
476 among the *FLO1* tandem repeats specifically detects limited deletions occurring between  
477 dispersed repeated DNA through SSA (Verstrepen et al., 2005), thus allowing this  
478 quantitative measurement of a specific pathway activity. Second, as mentioned in a recent  
479 study (Keren et al., 2016), these genome-wide libraries of knock-outs, reduction-of-function  
480 and overexpression delineate the effects of extreme expression levels that are typically far  
481 from wild-type expression: they do not reveal the dependence of phenotype on expression  
482 variations that occur in the vicinity of wild-type level. The authors of this study explored the  
483 relationship between gene expression and phenotype along a large expression spectrum with  
484 small increments to provide more information on the sensitivity of cellular properties to the  
485 expression levels. Unfortunately no gene involved in DNA repair or recombination was part  
486 of the study. A former study in *E. coli* modulated the expression of the mismatch repair  
487 protein MutL at multiple different cellular levels and revealed that the frequency of deletion-  
488 generating recombination is inversely related to the amount of MutL while mismatch repair  
489 activity is insensitive to fluctuations in MutL (Elez et al., 2007). Nevertheless in all cases  
490 phenotypic measurements were performed on whole populations harboring various mean  
491 expression levels, even if they were only slightly different. The present study takes a further  
492 step by allowing testing the degree of heterogeneity in genome stability in the range of  
493 “natural” or “physiological” stochastic variations of genes involved in DNA replication,  
494 repair and recombination.

495 HR can produce gene copy number variations (CNV) if the distance between the  
496 repeated sequences is relatively short (Hastings et al., 2009). Indeed, the fact that resection  
497 reaches both repeats so that the break is repaired by SSA is less likely when the distance  
498 separating the repeats increases (Hastings et al., 2009). More generally, SSA is responsible for  
499 repeat-mediated rearrangements (Bhargava et al., 2016) and HR globally contains the intrinsic  
500 capacity to modify genetic material through gene conversion and crossing over (Guirouilh-  
501 Barbat et al., 2014). Thus it was highly conceivable that noise in the expression of genes  
502 affecting HR activity produces variable capacity to evolve (evolvability) (Capp, 2010), as  
503 recently suggested for mutagenesis in *E. coli* (Uphoff et al., 2016).

504 Interestingly from an evolutionary viewpoint, we observed that HR rate scales non-  
505 linearly with Rad27 levels. If the relationship was linear, the total amount of HR would  
506 depend only on the averaged Rad27 expression. On the contrary this non-linearity implies that  
507 mean doubling Rad27 levels do not lead to a doubling of HR rate. Total amount of HR cannot  
508 be explained solely by the population- or time-averaged Rad27 expression and slight  
509 modifications of the Rad27 mean expression level in the population could generate high  
510 variation in the total amount of HR and allow its rapid tuning without the need of strong  
511 expression variations or mutant alleles. Moreover, modifying Rad27 expression noise, while  
512 keeping the average expression level the same, would have an effect on the total amount of  
513 HR. Such modifications of noise levels have be considered as another way to modify HR rate  
514 at the whole-population level apart from modifications of mean levels. This also suggests that  
515 noise levels in the expression of genes affecting genome stability could be under positive or  
516 negative selection. This direct influence of gene expression noise on the rate of appearance of  
517 genetic variations has to be considered in addition to, and independently of, recent  
518 observations showing that evolvability is dependent on the level of noise in the expression of  
519 genes affecting resistance in selective environments because it shapes mutational effects  
520 (Bodi et al., 2017).

521 Finally the human *RAD27* homolog *FEN1* (Singh et al., 2008) and *RAD52* (Lieberman  
522 et al., 2016), as well as many other genes involved in DNA replication, repair and  
523 recombination (Lahtz and Pfeifer, 2011; Chae et al., 2016), can be over- or under-expressed in  
524 human cancers thus producing genetic instability (Stratton et al., 2009). One can suggest that  
525 these expression variations are selected for along with the beneficial genetic alterations they  
526 have produced, the initial source of variations being gene expression noise (Capp, 2010).  
527 Moreover noise could be globally increased in cancer cells, with consequences on genome  
528 instability (Capp, 2005; 2010; 2017). Given the diverse influences of gene expression noise  
529 on genotype variations that this work and other recent works (Bodi et al., 2017) revealed, the  
530 idea to control the level of expression noise among cancer cells might allow limiting  
531 evolvability, and escape from therapy (Capp, 2012; Brock et al., 2015). The same idea could  
532 be applied to microbial populations in the aim to stabilize production phenotypes for instance  
533 by avoiding the appearance of extreme subpopulations with high genome instability that  
534 would more probably lose interesting production features. Finally, this interplay between the  
535 genetic, epigenetic, and gene expression variabilities is a highly exciting field of investigation,  
536 and could help elucidating the degree to which noise levels are indeed under selection and the  
537 environmental conditions favoring such selection (Keren et al., 2016), especially when  
538 affecting genome stability. In conclusion, the present study revealed that gene expression  
539 variability can produce heterogeneous evolvability through homologous recombination from  
540 cell-to-cell, with probable consequences for instance in terms of stress response in microbial  
541 populations or evolution of cancer cell populations in oncogenesis and therapeutic response.

542 Acknowledgements

543 This work was in part supported by the Agence Nationale de la Recherche (grant number  
544 ANR-12-JSV6-0006 to JPC). We are grateful to Delphine Lestrade and Julien Cescut from the  
545 Toulouse White Biotechnology consortium for flow cytometry facilities, to Adilia  
546 Dagkesamanskaia for her helpful contribution and to Sébastien Déjean for his advices on  
547 statistical analysis. We also thank Kevin J Verstrepen for providing the KV133 strain containing  
548 the recombination substrate. Finally we are thankful to Fayza Daboussi, Yvan Canitrot and Ivan  
549 Matic for critical reading of the manuscript.

550

551



552 Author Contributions Statement

553 J.L., J.M.F and J.P.C. conceived and designed the experiments. J.L. performed experiments.

554 J.L. and J.P.C. wrote the manuscript.

555

556 Conflict of Interest Statement

557 None

558

559 References

- 560 Alexander, H.K., Mayer, S.I., and Bonhoeffer, S. (2017). Population Heterogeneity in  
561 Mutation Rate Increases the Frequency of Higher-Order Mutants and Reduces Long-  
562 Term Mutational Load. *Mol Biol Evol* 34, 419-436.
- 563 Alvaro, D., Lisby, M., and Rothstein, R. (2007). Genome-wide analysis of Rad52 foci reveals  
564 diverse mechanisms impacting recombination. *PLoS Genet* 3, e228.
- 565 Ang, J.S., Duffy, S., Segovia, R., Stirling, P.C., and Hieter, P. (2016). Dosage Mutator Genes  
566 in *Saccharomyces cerevisiae*: A Novel Mutator Mode-of-action of the Mph1 DNA  
567 Helicase. *Genetics*.
- 568 Balakrishnan, L., and Bambara, R.A. (2013). Flap endonuclease 1. *Annu Rev Biochem* 82,  
569 119-138.
- 570 Bar-Even, A., Paulsson, J., Maheshri, N., Carmi, M., O'shea, E., Pilpel, Y., and Barkai, N.  
571 (2006). Noise in protein expression scales with natural protein abundance. *Nat Genet*  
572 38, 636-643.
- 573 Becker, J.R., Gallo, D., Leung, W., Croissant, T., Thu, Y.M., Nguyen, H.D., Starr, T.K.,  
574 Brown, G.W., and Bielinsky, A.K. (2018). Flap endonuclease overexpression drives  
575 genome instability and DNA damage hypersensitivity in a PCNA-dependent manner.  
576 *Nucleic Acids Res* 46, 5634-5650.
- 577 Bhargava, R., Onyango, D.O., and Stark, J.M. (2016). Regulation of Single-Strand Annealing  
578 and its Role in Genome Maintenance. *Trends Genet* 32, 566-575.
- 579 Blake, W.J., Balazsi, G., Kohanski, M.A., Isaacs, F.J., Murphy, K.F., Kuang, Y., Cantor,  
580 C.R., Walt, D.R., and Collins, J.J. (2006). Phenotypic consequences of promoter-  
581 mediated transcriptional noise. *Mol Cell* 24, 853-865.
- 582 Blake, W.J., M, K.A., Cantor, C.R., and Collins, J.J. (2003). Noise in eukaryotic gene  
583 expression. *Nature* 422, 633-637.
- 584 Bodi, Z., Farkas, Z., Nevozhay, D., Kalapis, D., Lazar, V., Csorgo, B., Nyerges, A., Szamecz,  
585 B., Fekete, G., Papp, B., Araujo, H., Oliveira, J.L., Moura, G., Santos, M.a.S.,  
586 Szekely, T., Jr., Balazsi, G., and Pal, C. (2017). Phenotypic heterogeneity promotes  
587 adaptive evolution. *PLoS Biol* 15, e2000644.
- 588 Brock, A., Krause, S., and Ingber, D.E. (2015). Control of cancer formation by intrinsic  
589 genetic noise and microenvironmental cues. *Nat Rev Cancer* 15, 499-509.
- 590 Capp, J.P. (2005). Stochastic gene expression, disruption of tissue averaging effects and  
591 cancer as a disease of development. *Bioessays* 27, 1277-1285.
- 592 Capp, J.P. (2010). Noise-driven heterogeneity in the rate of genetic-variant generation as a  
593 basis for evolvability. *Genetics* 185, 395-404.
- 594 Capp, J.P. (2012). Stochastic gene expression stabilization as a new therapeutic strategy for  
595 cancer. *Bioessays* 34, 170-173.
- 596 Capp, J.P. (2017). Tissue disruption increases stochastic gene expression thus producing  
597 tumors: Cancer initiation without driver mutation. *Int J Cancer* 140, 2408-2413.
- 598 Chae, Y.K., Anker, J.F., Carneiro, B.A., Chandra, S., Kaplan, J., Kalyan, A., Santa-Maria,  
599 C.A., Plataniias, L.C., and Giles, F.J. (2016). Genomic landscape of DNA repair genes  
600 in cancer. *Oncotarget* 7, 23312-23321.
- 601 Debrauwere, H., Loeillet, S., Lin, W., Lopes, J., and Nicolas, A. (2001). Links between  
602 replication and recombination in *Saccharomyces cerevisiae*: a hypersensitive  
603 requirement for homologous recombination in the absence of Rad27 activity. *Proc*  
604 *Natl Acad Sci U S A* 98, 8263-8269.
- 605 Dornfeld, K.J., and Livingston, D.M. (1992). Plasmid recombination in a rad52 mutant of  
606 *Saccharomyces cerevisiae*. *Genetics* 131, 261-276.
- 607 Duffy, S., Fam, H.K., Wang, Y.K., Styles, E.B., Kim, J.H., Ang, J.S., Singh, T., Larionov, V.,  
608 Shah, S.P., Andrews, B., Boerkoel, C.F., and Hieter, P. (2016). Overexpression

- 609 screens identify conserved dosage chromosome instability genes in yeast and human  
610 cancer. *Proc Natl Acad Sci U S A* 113, 9967-9976.
- 611 Dumont, B.L., Broman, K.W., and Payseur, B.A. (2009). Variation in genomic recombination  
612 rates among heterogeneous stock mice. *Genetics* 182, 1345-1349.
- 613 Elez, M., Radman, M., and Matic, I. (2007). The frequency and structure of recombinant  
614 products is determined by the cellular level of MutL. *Proc Natl Acad Sci U S A* 104,  
615 8935-8940.
- 616 Engels, K., Giannattasio, M., Muzi-Falconi, M., Lopes, M., and Ferrari, S. (2011). 14-3-3  
617 Proteins regulate exonuclease 1-dependent processing of stalled replication forks.  
618 *PLoS Genet* 7, e1001367.
- 619 Fraser, D., and Kaern, M. (2009). A chance at survival: gene expression noise and phenotypic  
620 diversification strategies. *Mol Microbiol* 71, 1333-1340.
- 621 Guirouilh-Barbat, J., Lambert, S., Bertrand, P., and Lopez, B.S. (2014). Is homologous  
622 recombination really an error-free process? *Front Genet* 5, 175.
- 623 Hastings, P.J., Lupski, J.R., Rosenberg, S.M., and Ira, G. (2009). Mechanisms of change in  
624 gene copy number. *Nat Rev Genet* 10, 551-564.
- 625 Hou, Y., Fan, W., Yan, L., Li, R., Lian, Y., Huang, J., Li, J., Xu, L., Tang, F., Xie, X.S., and  
626 Qiao, J. (2013). Genome analyses of single human oocytes. *Cell* 155, 1492-1506.
- 627 Johnson, R.E., Kovvali, G.K., Prakash, L., and Prakash, S. (1995). Requirement of the yeast  
628 RTH1 5' to 3' exonuclease for the stability of simple repetitive DNA. *Science* 269,  
629 238-240.
- 630 Kauppi, L., Jeffreys, A.J., and Keeney, S. (2004). Where the crossovers are: recombination  
631 distributions in mammals. *Nat Rev Genet* 5, 413-424.
- 632 Keren, L., Hausser, J., Lotan-Pompan, M., Vainberg Slutskin, I., Alisar, H., Kaminski, S.,  
633 Weinberger, A., Alon, U., Milo, R., and Segal, E. (2016). Massively Parallel  
634 Interrogation of the Effects of Gene Expression Levels on Fitness. *Cell* 166, 1282-  
635 1294 e1218.
- 636 Kikuchi, K., Taniguchi, Y., Hatanaka, A., Sonoda, E., Hohegger, H., Adachi, N., Matsuzaki,  
637 Y., Koyama, H., Van Gent, D.C., Jasin, M., and Takeda, S. (2005). Fen-1 facilitates  
638 homologous recombination by removing divergent sequences at DNA break ends. *Mol*  
639 *Cell Biol* 25, 6948-6955.
- 640 Kim, D.R., Gidvani, R.D., Ingalls, B.P., Duncker, B.P., and McConkey, B.J. (2011).  
641 Differential chromatin proteomics of the MMS-induced DNA damage response in  
642 yeast. *Proteome Sci* 9, 62.
- 643 Kokoska, R.J., Stefanovic, L., Tran, H.T., Resnick, M.A., Gordenin, D.A., and Petes, T.D.  
644 (1998). Destabilization of yeast micro- and minisatellite DNA sequences by mutations  
645 affecting a nuclease involved in Okazaki fragment processing (rad27) and DNA  
646 polymerase delta (pol3-t). *Mol Cell Biol* 18, 2779-2788.
- 647 Kumar, R. (2017). An account of fungal 14-3-3 proteins. *Eur J Cell Biol* 96, 206-217.
- 648 Lahtz, C., and Pfeifer, G.P. (2011). Epigenetic changes of DNA repair genes in cancer. *J Mol*  
649 *Cell Biol* 3, 51-58.
- 650 Lieberman, R., Xiong, D., James, M., Han, Y., Amos, C.I., Wang, L., and You, M. (2016).  
651 Functional characterization of RAD52 as a lung cancer susceptibility gene in the  
652 12p13.33 locus. *Mol Carcinog* 55, 953-963.
- 653 Liu, J., Francois, J.M., and Capp, J.P. (2016). Use of noise in gene expression as an  
654 experimental parameter to test phenotypic effects. *Yeast* 33, 209-216.
- 655 Liu, J., Martin-Yken, H., Bigey, F., Dequin, S., Francois, J.M., and Capp, J.P. (2015). Natural  
656 yeast promoter variants reveal epistasis in the generation of transcriptional-mediated  
657 noise and its potential benefit in stressful conditions. *Genome Biol Evol* 7, 969-984.

- 658 Lu, S., Zong, C., Fan, W., Yang, M., Li, J., Chapman, A.R., Zhu, P., Hu, X., Xu, L., Yan, L.,  
659 Bai, F., Qiao, J., Tang, F., Li, R., and Xie, X.S. (2012). Probing meiotic recombination  
660 and aneuploidy of single sperm cells by whole-genome sequencing. *Science* 338,  
661 1627-1630.
- 662 Moore, C.W. (1988). Internucleosomal cleavage and chromosomal degradation by bleomycin  
663 and phleomycin in yeast. *Cancer Res* 48, 6837-6843.
- 664 Negritto, M.C., Qiu, J., Ratay, D.O., Shen, B., and Bailis, A.M. (2001). Novel function of  
665 Rad27 (FEN-1) in restricting short-sequence recombination. *Mol Cell Biol* 21, 2349-  
666 2358.
- 667 New, J.H., Sugiyama, T., Zaitseva, E., and Kowalczykowski, S.C. (1998). Rad52 protein  
668 stimulates DNA strand exchange by Rad51 and replication protein A. *Nature* 391,  
669 407-410.
- 670 Newman, J.R., Ghaemmaghami, S., Ihmels, J., Breslow, D.K., Noble, M., Derisi, J.L., and  
671 Weissman, J.S. (2006). Single-cell proteomic analysis of *S. cerevisiae* reveals the  
672 architecture of biological noise. *Nature* 441, 840-846.
- 673 Paques, F., and Haber, J.E. (1999). Multiple pathways of recombination induced by double-  
674 strand breaks in *Saccharomyces cerevisiae*. *Microbiol Mol Biol Rev* 63, 349-404.
- 675 Raser, J.M., and O'shea, E.K. (2005). Noise in gene expression: origins, consequences, and  
676 control. *Science* 309, 2010-2013.
- 677 Rattray, A.J., and Symington, L.S. (1994). Use of a chromosomal inverted repeat to  
678 demonstrate that the RAD51 and RAD52 genes of *Saccharomyces cerevisiae* have  
679 different roles in mitotic recombination. *Genetics* 138, 587-595.
- 680 Silander, O.K., Nikolic, N., Zaslaver, A., Bren, A., Kikoin, I., Alon, U., and Ackermann, M.  
681 (2012). A genome-wide analysis of promoter-mediated phenotypic noise in  
682 *Escherichia coli*. *PLoS Genet* 8, e1002443.
- 683 Singh, P., Yang, M., Dai, H., Yu, D., Huang, Q., Tan, W., Kernstine, K.H., Lin, D., and Shen,  
684 B. (2008). Overexpression and hypomethylation of flap endonuclease 1 gene in breast  
685 and other cancers. *Mol Cancer Res* 6, 1710-1717.
- 686 Skotheim, J.M., Di Talia, S., Siggia, E.D., and Cross, F.R. (2008). Positive feedback of G1  
687 cyclins ensures coherent cell cycle entry. *Nature* 454, 291-296.
- 688 Smith, M.C., Sumner, E.R., and Avery, S.V. (2007). Glutathione and Gts1p drive beneficial  
689 variability in the cadmium resistances of individual yeast cells. *Mol Microbiol* 66,  
690 699-712.
- 691 Sommers, C.H., Miller, E.J., Dujon, B., Prakash, S., and Prakash, L. (1995). Conditional  
692 lethality of null mutations in RTH1 that encodes the yeast counterpart of a mammalian  
693 5'- to 3'-exonuclease required for lagging strand DNA synthesis in reconstituted  
694 systems. *J Biol Chem* 270, 4193-4196.
- 695 Song, B., and Sung, P. (2000). Functional interactions among yeast Rad51 recombinase,  
696 Rad52 mediator, and replication protein A in DNA strand exchange. *J Biol Chem* 275,  
697 15895-15904.
- 698 Stirling, P.C., Bloom, M.S., Solanki-Patil, T., Smith, S., Sipahimalani, P., Li, Z., Kofoed, M.,  
699 Ben-Aroya, S., Myung, K., and Hieter, P. (2011). The complete spectrum of yeast  
700 chromosome instability genes identifies candidate CIN cancer genes and functional  
701 roles for ASTRA complex components. *PLoS Genet* 7, e1002057.
- 702 Stratton, M.R., Campbell, P.J., and Futreal, P.A. (2009). The cancer genome. *Nature* 458,  
703 719-724.
- 704 Symington, L.S. (1998). Homologous recombination is required for the viability of rad27  
705 mutants. *Nucleic Acids Res* 26, 5589-5595.
- 706 Symington, L.S. (2002). Role of RAD52 epistasis group genes in homologous recombination  
707 and double-strand break repair. *Microbiol Mol Biol Rev* 66, 630-670, table of contents.

- 708 Symington, L.S., Rothstein, R., and Lisby, M. (2014). Mechanisms and regulation of mitotic  
709 recombination in *Saccharomyces cerevisiae*. *Genetics* 198, 795-835.
- 710 Thomas, B.J., and Rothstein, R. (1989). Elevated recombination rates in transcriptionally  
711 active DNA. *Cell* 56, 619-630.
- 712 Tishkoff, D.X., Filosi, N., Gaida, G.M., and Kolodner, R.D. (1997). A novel mutation  
713 avoidance mechanism dependent on *S. cerevisiae* RAD27 is distinct from DNA  
714 mismatch repair. *Cell* 88, 253-263.
- 715 Uphoff, S., Lord, N.D., Okumus, B., Potvin-Trottier, L., Sherratt, D.J., and Paulsson, J.  
716 (2016). Stochastic activation of a DNA damage response causes cell-to-cell mutation  
717 rate variation. *Science* 351, 1094-1097.
- 718 Usui, T., and Petrini, J.H. (2007). The *Saccharomyces cerevisiae* 14-3-3 proteins Bmh1 and  
719 Bmh2 directly influence the DNA damage-dependent functions of Rad53. *Proc Natl*  
720 *Acad Sci U S A* 104, 2797-2802.
- 721 Verstrepen, K.J., Jansen, A., Lewitter, F., and Fink, G.R. (2005). Intragenic tandem repeats  
722 generate functional variability. *Nat Genet* 37, 986-990.
- 723 Viney, M., and Reece, S.E. (2013). Adaptive noise. *Proc Biol Sci* 280, 20131104.
- 724 Wang, J., Fan, H.C., Behr, B., and Quake, S.R. (2012). Genome-wide single-cell analysis of  
725 recombination activity and de novo mutation rates in human sperm. *Cell* 150, 402-412.
- 726 Yuen, K.W., Warren, C.D., Chen, O., Kwok, T., Hieter, P., and Spencer, F.A. (2007).  
727 Systematic genome instability screens in yeast and their potential relevance to cancer.  
728 *Proc Natl Acad Sci U S A* 104, 3925-3930.
- 729 Zheng, L., and Shen, B. (2011). Okazaki fragment maturation: nucleases take centre stage. *J*  
730 *Mol Cell Biol* 3, 23-30.
- 731 Zhu, J., Heinecke, D., Mulla, W.A., Bradford, W.D., Rubinstein, B., Box, A., Haug, J.S., and  
732 Li, R. (2015). Single-Cell Based Quantitative Assay of Chromosome Transmission  
733 Fidelity. *G3 (Bethesda)* 5, 1043-1056.
- 734 Zopf, C.J., Quinn, K., Zeidman, J., and Maheshri, N. (2013). Cell-cycle dependence of  
735 transcription dominates noise in gene expression. *PLoS Comput Biol* 9, e1003161.

736

## 737 Figure Legends

738 **Figure 1.** Experimental procedure. (A) Homologous recombination (HR) frequency between  
739 intragenic repeats in *FLO1* was measured by the loss of the *URA3* expression cassette integrated  
740 in the middle of the *FLO1* repeats (Verstrepen et al., 2005). When a recombination event occurs  
741 in the repeats, the *URA3* marker loss results in a 5-FOA resistant (*Ura*<sup>-</sup>) strain containing a new  
742 *FLO1* allele. (B) The double fluorescent marker YFP-tdTomato was fused to either *RAD52* or  
743 *RAD27* at their original genomic locus in the strain harbouring the recombination substrate,  
744 allowing sorting of cells with extreme expression levels.  $5 \cdot 10^6$  to  $10^7$  cells were sorted for each  
745 subpopulation, and spread on 5-FOA plates. In parallel viability was evaluated on YPD plates,  
746 allowing calculation their respective rate of loss of *URA3* function.

747

748 **Figure 2.** Noise in the expression of genes affecting HR activity produces cell-to-cell  
749 heterogeneity in spontaneous HR rate. (A) Spontaneous frequency of loss of *URA3* function in the  
750 subpopulations with the highest (10%) and lowest (10%) Rad27-YFP-tdTomato cellular amounts.  
751 (B) Spontaneous frequency of loss of *URA3* function in the subpopulations with the highest (10%)  
752 and lowest (10%) Rad52-YFP-tdTomato cellular amounts. (C) Phleomycin-induced frequency of  
753 loss of *URA3* function in the subpopulations with the highest (10%) and lowest (10%) Rad27-  
754 YFP-tdTomato cellular amounts. Results are the mean of 3 independent experiments with  
755 standard deviation. (D) Examples of PCR amplification of the new *FLO1* alleles in 5-FOA  
756 resistant clones showing that their length is modified in the high-expressing subpopulations, and  
757 not in the low-expressing subpopulations compared to the control strain (C). PCR amplification of  
758 the *URA3* gene in the same clones showed that it is lost by HR in the high-expressing  
759 subpopulations and still present in the low-expressing subpopulations.

760

761 **Figure 3.** HR rate non-linearly scales with Rad27 levels and is weakly correlated with differences  
762 in cell cycle distribution. (A) Five subpopulations homogeneously distributed in the whole  
763 population were sorted thanks to the fused protein Rad27-YFP-tdTomato. Each subpopulation  
764 represents 10% of the whole population. They are numbered 1 to 5 from the lowest to the highest  
765 expression levels. About  $2 \cdot 10^6$  cells were sorted for each subpopulation (3 independent  
766 experiments), and spread on 5-FOA plates. In parallel viability was evaluated on YPD plates,  
767 allowing calculation their respective frequency of loss of *URA3* function. 3 independent  
768 experiments were performed. (B) Measurable rates on these five subpopulations (in blue) were  
769 combined to the results obtained in Figure 2A (in red) to plot the relationship between rate of loss  
770 of *URA3* function and Rad27 levels. Each dot represents one sorting experiment for one  
771 subpopulation that has given a measurable rate. When no rate was measurable because of the  
772 absence of 5-FOA resistance clone, the maximal rate is written. As shown in Figure 2D, 5-FOA  
773 resistance is due to mutation-based inactivation of the *URA3* gene in subpopulations 1 to 3 and to  
774 recombination-based loss of the *URA3* marker in subpopulations 4 and 5. A significant statistical  
775 difference is represented by (\*) when  $p < 0.05$  in Wilcoxon signed rank test. (C) Cell cycle  
776 distribution in the five subpopulations isolated from the Rad27-YFP-tdTomato-expressing  
777 population is represented.

778

779 **Figure 4.** The initiating DNA damage is not responsible for the observed heterogeneity in HR  
780 rate. (A) Dot plot of the population expressing *pBMH1-GFP* and *RAD27-YFP-TdTomato*, with  
781 gates allowing sorting of cells with similar expression levels of one fluorescent marker and  
782 extreme expression levels of the other. (B) Rad27-YFP-tdTomato and GFP levels in the four  
783 subpopulations isolated from the previous dot plot. (C) Spontaneous HR frequency in the

784 subpopulations with similar *pBMH1-GFP* expression levels and the highest (10%) and lowest  
785 (10%) Rad27-YFP-tdTomato cellular amounts, and in the subpopulations with similar *RAD27-*  
786 *YFP-TdTomato* expression levels and the highest (10%) and lowest (10%) GFP cellular amounts.  
787 Results are the mean of 3 independent experiments with standard deviation. (D) Cell cycle  
788 distribution in the four subpopulations isolated from the previous dot plot.



789 **Figures**

790 Figure 1

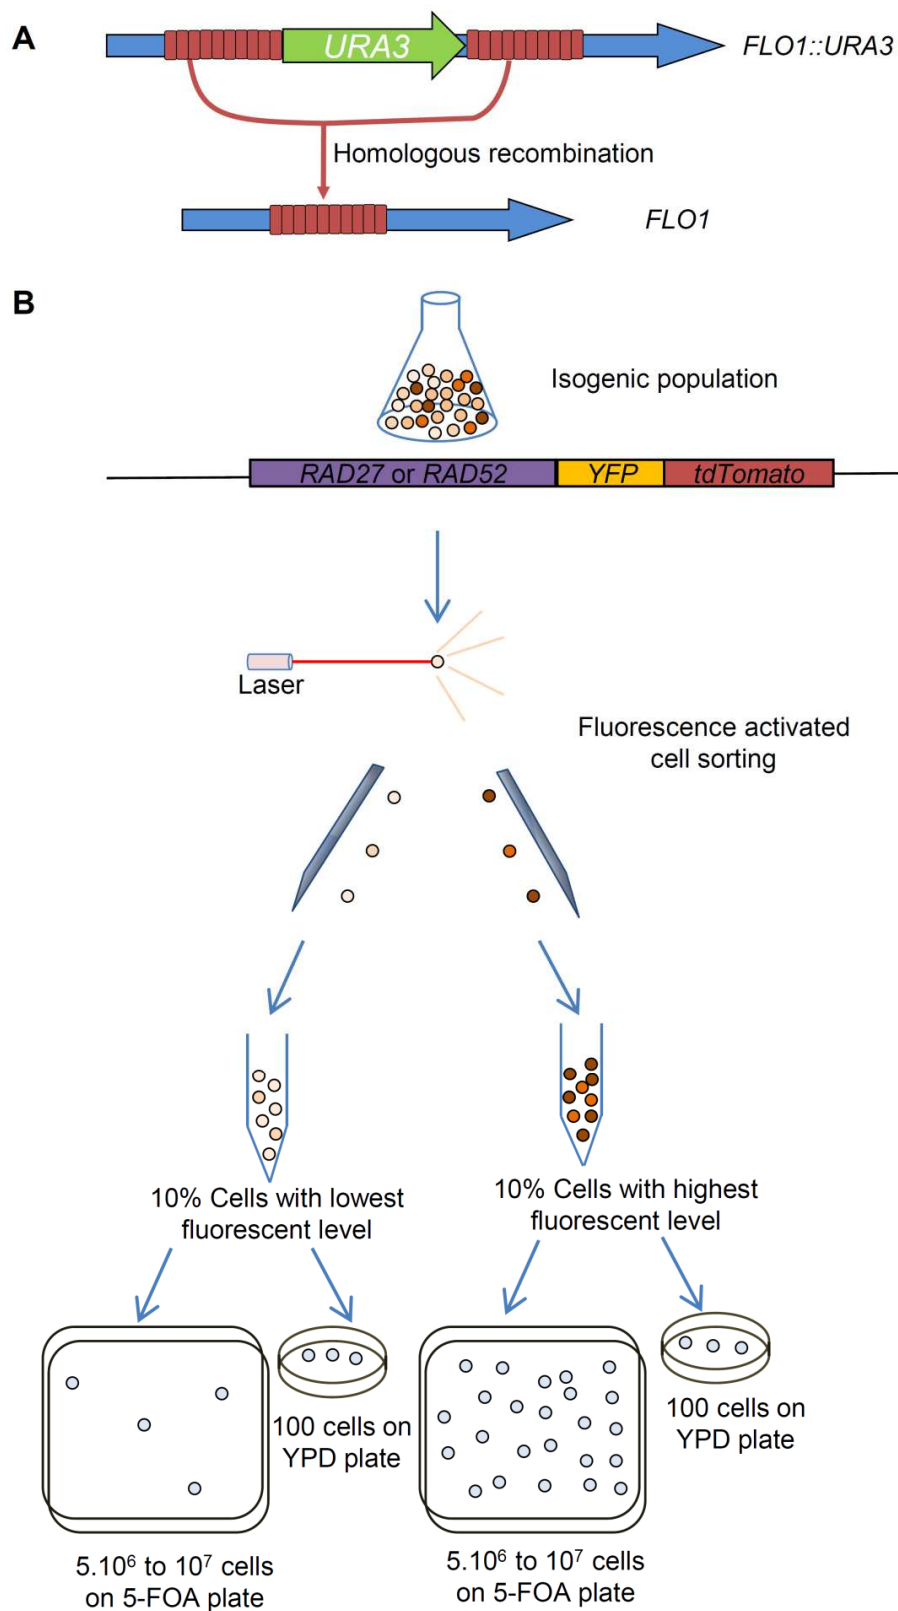

791

792 Figure 2

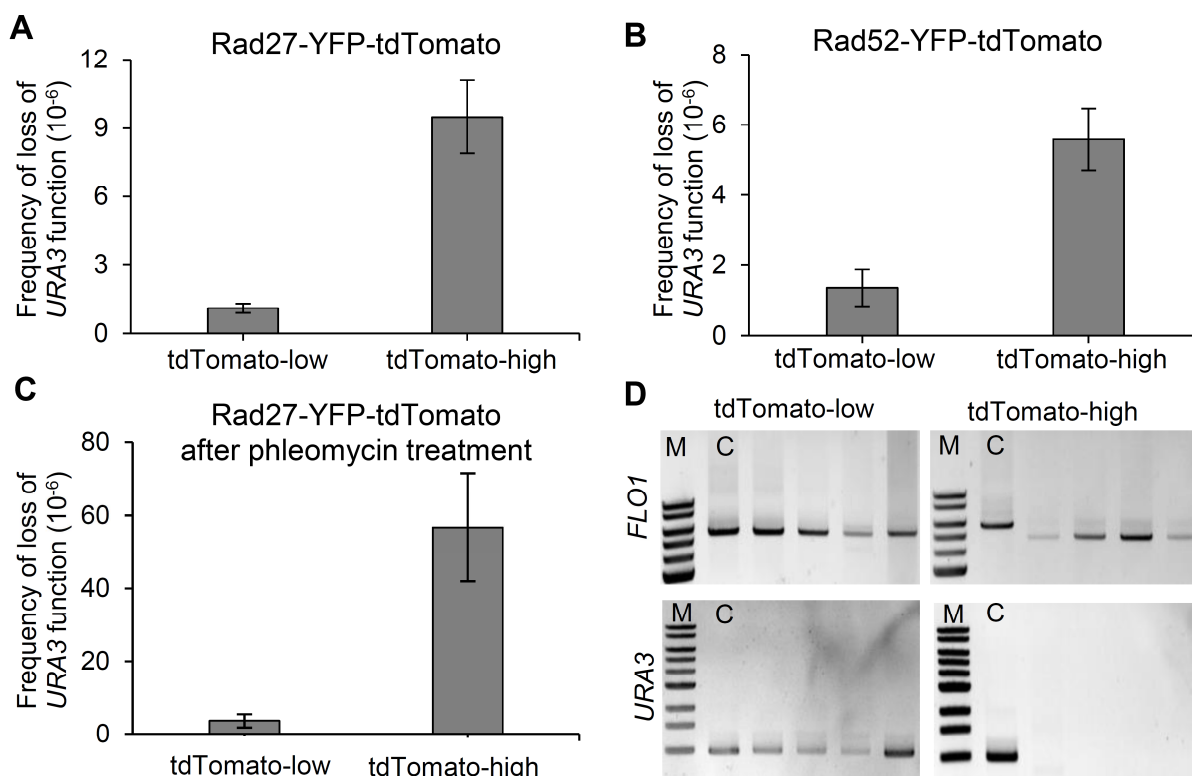

793

794

795

796 Figure 3

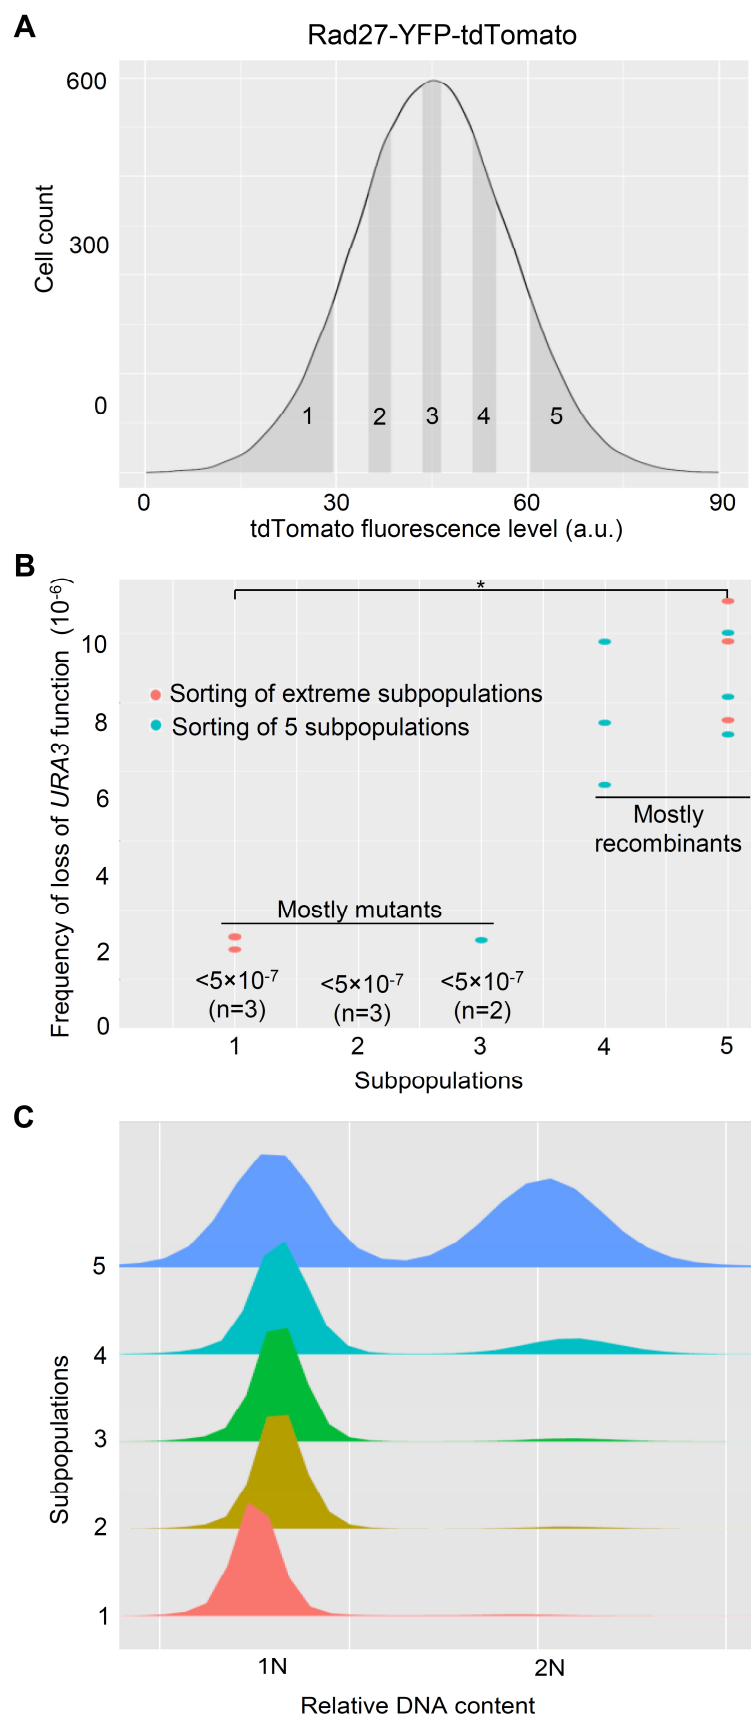

797

798

799 Figure 4

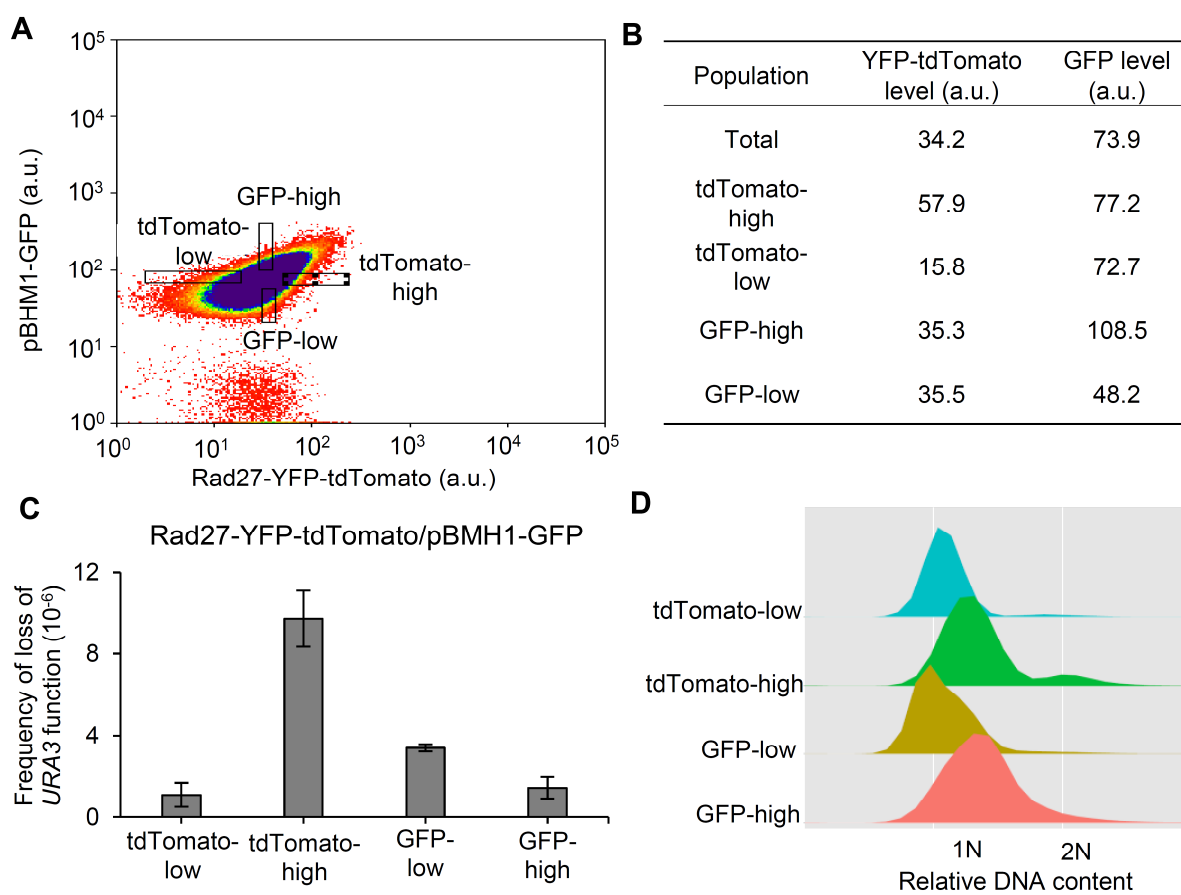

800

801

802

803
